# Supplementary material for: Bloodstream Infections in Hospitalized Patients with COVID-19: A Systematic Review and Meta-Analysis
Source: MDPI journal article supplement (doi:10.3390/microorganisms9102016), 2021-09-23
Supplement: s1 [file s1]

Online supplementary material to:

## **Bloodstream infections in hospitalized patients with COVID-19: a systematic review and meta-analysis**

Mariachiara Ippolito<sup>a</sup>, Barbara Simone<sup>a</sup>, Carlotta Filisina<sup>a</sup>, Francesca Romana Catalanotto<sup>a</sup>, Giulia Catalisano<sup>a</sup>, Claudia Marino<sup>a</sup>,  
Giovanni Misseri<sup>b</sup>, Antonino Giarratano<sup>a,c</sup>, Andrea Cortegiani<sup>a,c</sup>

a) Department of Surgical, Oncological and Oral Science (Di.Chir.On.S.), University of Palermo, Italy

b) Fondazione Giglio, Cefalù, Italy

c) Department of Anaesthesia, Intensive Care and Emergency, Policlinico Paolo Giaccone, Palermo, Italy

**Corresponding author:** Andrea Cortegiani, MD, Department of Surgical, Oncological and Oral Science (Di.Chir.On.S.), University of Palermo, Italy. Department of Anaesthesia, Intensive Care and Emergency, Policlinico Paolo Giaccone, Palermo, Italy, Via del Vespro 129, 90127 Palermo, Italy. Email: andrea.cortegiani@unipa.it; Tel.: +390916552730

## **CONTENT**

Figure S1. Forest plot with the result of the subgroup analysis on the occurrence of bloodstream infection in patients with COVID-19 in multicentre studies.

Figure S2. Forest plot with the result of the subgroup analysis on the occurrence of bloodstream infection in patients with COVID-19 in single centre studies.

Figure S3. Forest plot with the result of the post-hoc subgroup analysis considering only data from studies specifically addressing hospital-acquired bloodstream infections.

Table S1. PRISMA Main Checklist and PRISMA Abstract Checklist

Table S2. Characteristics of bloodstream infections and isolates

Table S3. Quality assessment of studies according to MINORS score for non-comparative studies

Table S4. Quality assessment of studies according to MINORS additional score for comparative studies

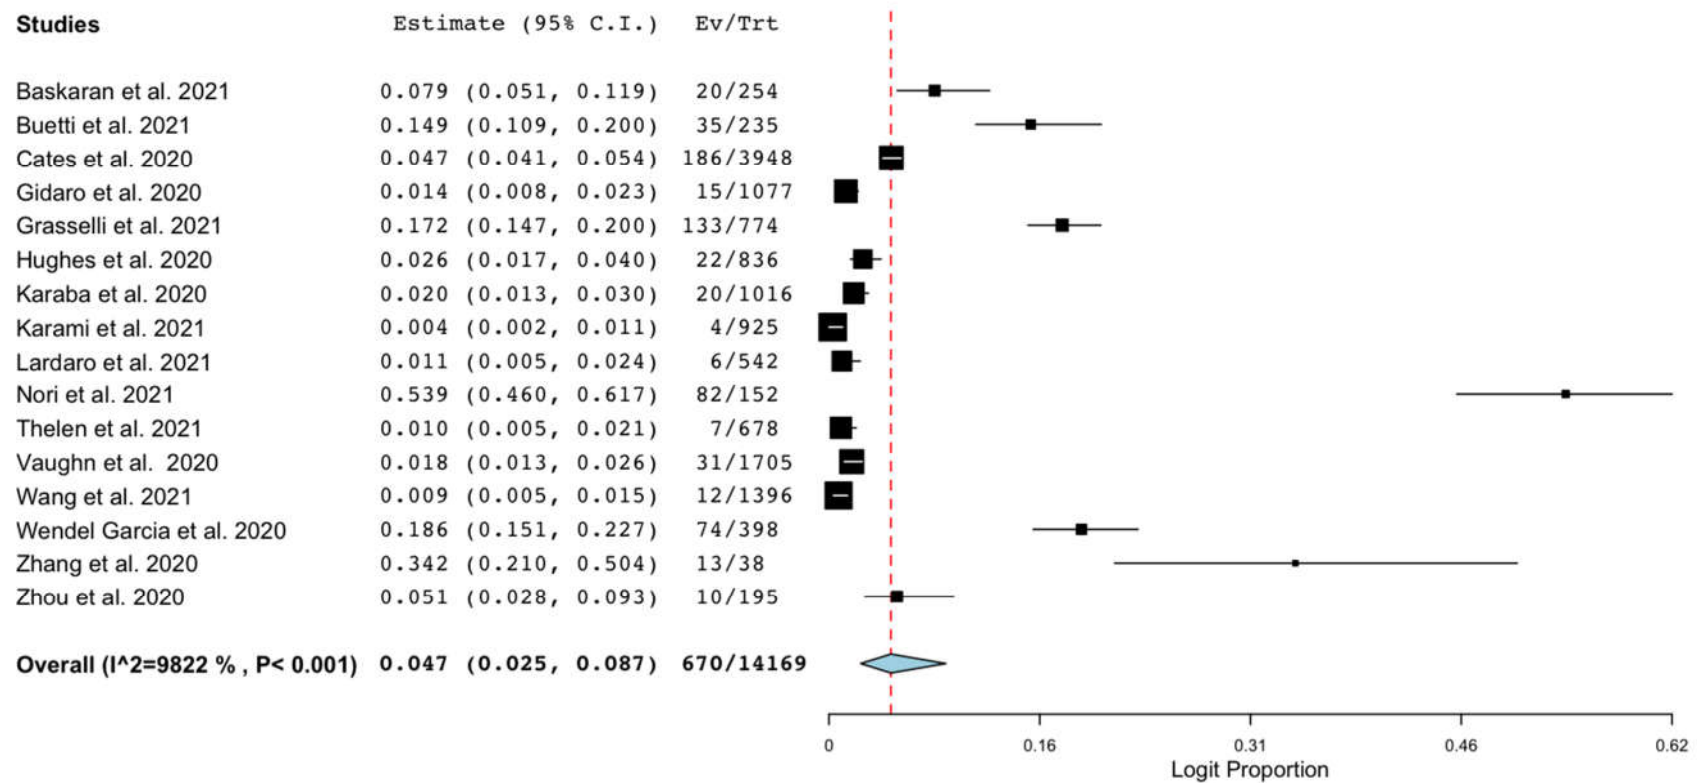

**Figure S1.** Forest plot with the result of the subgroup analysis on the occurrence of bloodstream infection in patients with COVID-19 in multicentre studies. C.I., confidence interval; Ev, events; Trt, total.

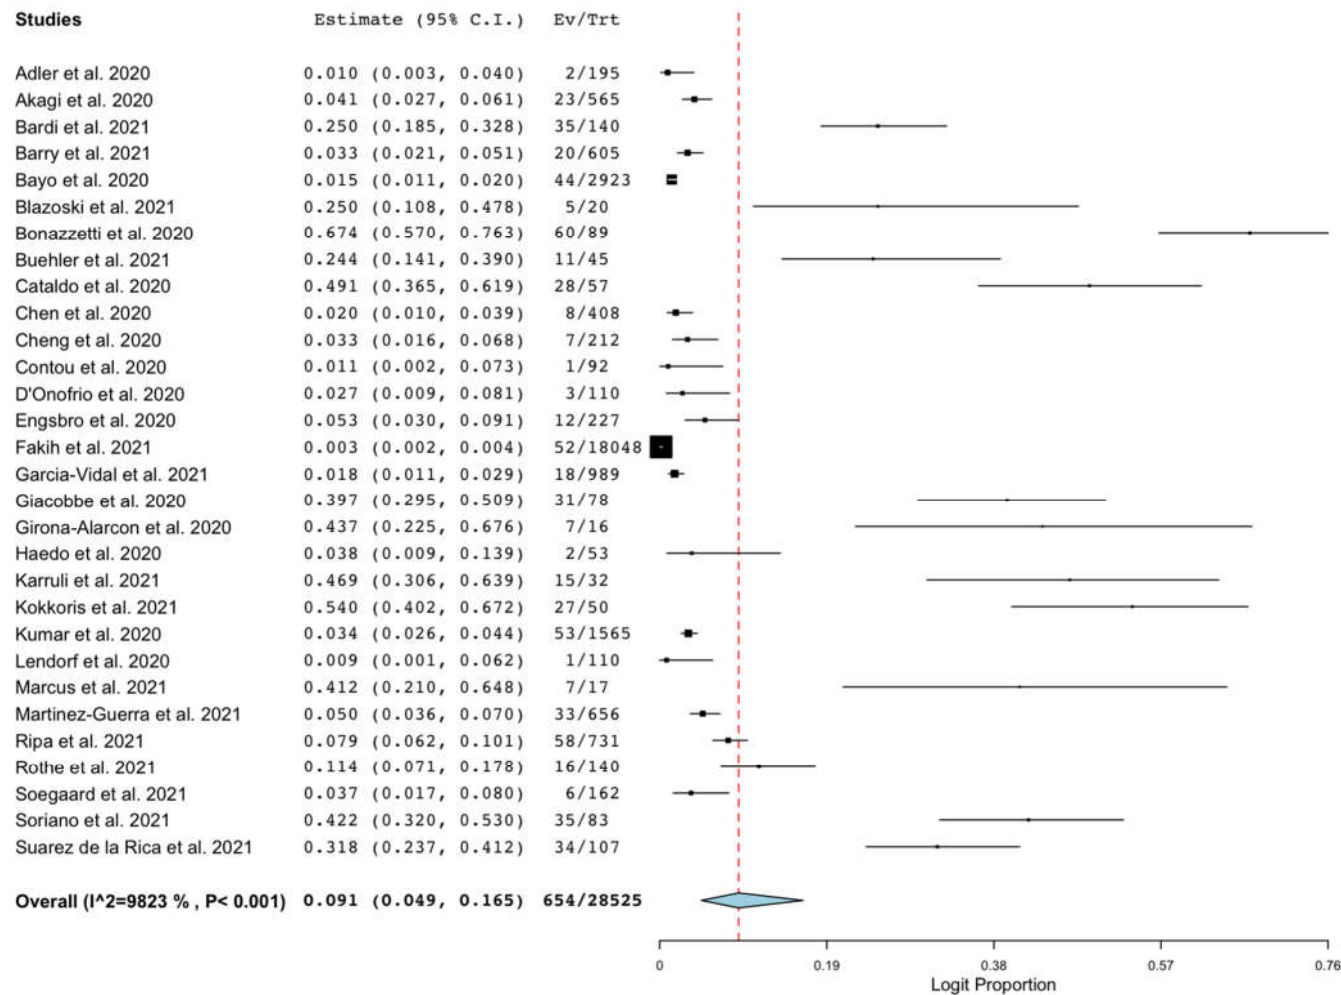

**Figure S2.** Forest plot with the result of the subgroup analysis on the occurrence of bloodstream infection in patients with COVID-19 in single centre studies. C.I., confidence interval; Ev, events; Trt, total.

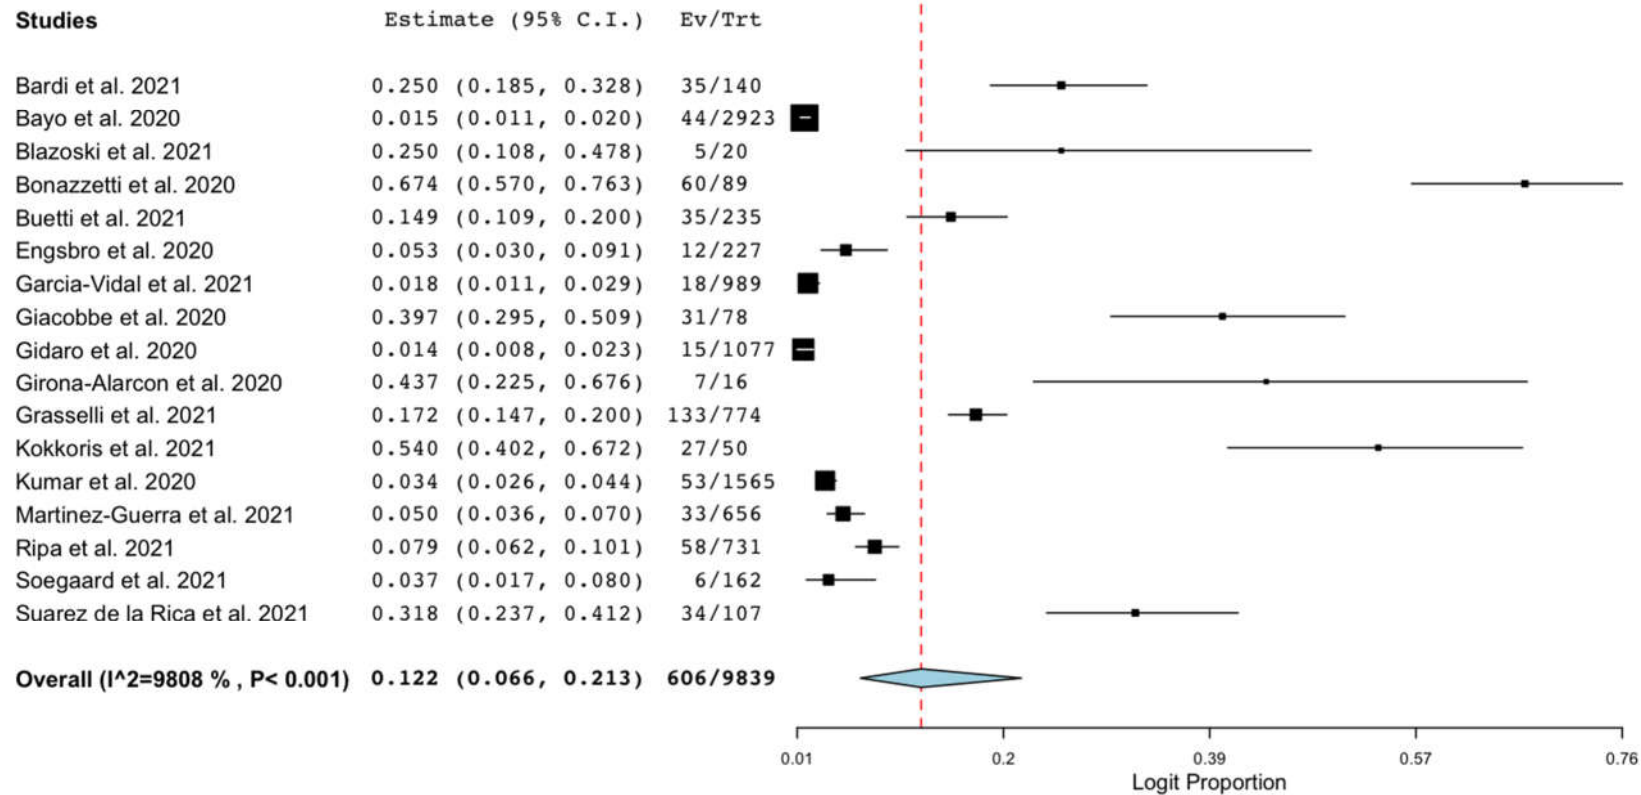

**Figure S3.** Forest plot with the result of the post-hoc subgroup analysis considering only data from studies specifically addressing hospital-acquired bloodstream infections. C.I., confidence interval; Ev, events; Trt, total.

| Section and Topic       | Item # | Checklist item                                                                                                                                                                                                                                                                                       | Location where item is reported |
|-------------------------|--------|------------------------------------------------------------------------------------------------------------------------------------------------------------------------------------------------------------------------------------------------------------------------------------------------------|---------------------------------|
| <b>TITLE</b>            |        |                                                                                                                                                                                                                                                                                                      |                                 |
| Title                   | 1      | Identify the report as a systematic review.                                                                                                                                                                                                                                                          | Page 1                          |
| <b>ABSTRACT</b>         |        |                                                                                                                                                                                                                                                                                                      |                                 |
| Abstract                | 2      | See the PRISMA 2020 for Abstracts checklist.                                                                                                                                                                                                                                                         | Page 1                          |
| <b>INTRODUCTION</b>     |        |                                                                                                                                                                                                                                                                                                      |                                 |
| Rationale               | 3      | Describe the rationale for the review in the context of existing knowledge.                                                                                                                                                                                                                          | Page 1                          |
| Objectives              | 4      | Provide an explicit statement of the objective(s) or question(s) the review addresses.                                                                                                                                                                                                               | Page 1                          |
| <b>METHODS</b>          |        |                                                                                                                                                                                                                                                                                                      |                                 |
| Eligibility criteria    | 5      | Specify the inclusion and exclusion criteria for the review and how studies were grouped for the syntheses.                                                                                                                                                                                          | Page 2                          |
| Information sources     | 6      | Specify all databases, registers, websites, organisations, reference lists and other sources searched or consulted to identify studies. Specify the date when each source was last searched or consulted.                                                                                            | Page 2                          |
| Search strategy         | 7      | Present the full search strategies for all databases, registers and websites, including any filters and limits used.                                                                                                                                                                                 | Suppl. Material 1               |
| Selection process       | 8      | Specify the methods used to decide whether a study met the inclusion criteria of the review, including how many reviewers screened each record and each report retrieved, whether they worked independently, and if applicable, details of automation tools used in the process.                     | Page 2                          |
| Data collection process | 9      | Specify the methods used to collect data from reports, including how many reviewers collected data from each report, whether they worked independently, any processes for obtaining or confirming data from study investigators, and if applicable, details of automation tools used in the process. | Page 2                          |
| Data items              | 10a    | List and define all outcomes for which data were sought. Specify whether all results that were compatible with each outcome domain in each study were sought (e.g. for all measures, time points, analyses), and if not, the methods used to decide which results to collect.                        | Page 2                          |
|                         | 10b    | List and define all other variables for which data were sought (e.g. participant and intervention characteristics, funding sources). Describe any                                                                                                                                                    | Page 2                          |

| Section and Topic             | Item # | Checklist item                                                                                                                                                                                                                                                                       | Location where item is reported |
|-------------------------------|--------|--------------------------------------------------------------------------------------------------------------------------------------------------------------------------------------------------------------------------------------------------------------------------------------|---------------------------------|
|                               |        | assumptions made about any missing or unclear information.                                                                                                                                                                                                                           |                                 |
| Study risk of bias assessment | 11     | Specify the methods used to assess risk of bias in the included studies, including details of the tool(s) used, how many reviewers assessed each study and whether they worked independently, and if applicable, details of automation tools used in the process.                    | Page 2                          |
| Effect measures               | 12     | Specify for each outcome the effect measure(s) (e.g. risk ratio, mean difference) used in the synthesis or presentation of results.                                                                                                                                                  | Page 2                          |
| Synthesis methods             | 13a    | Describe the processes used to decide which studies were eligible for each synthesis (e.g. tabulating the study intervention characteristics and comparing against the planned groups for each synthesis (item #5)).                                                                 | Page 2                          |
|                               | 13b    | Describe any methods required to prepare the data for presentation or synthesis, such as handling of missing summary statistics, or data conversions.                                                                                                                                | Page 2                          |
|                               | 13c    | Describe any methods used to tabulate or visually display results of individual studies and syntheses.                                                                                                                                                                               | Page 2                          |
|                               | 13d    | Describe any methods used to synthesize results and provide a rationale for the choice(s). If meta-analysis was performed, describe the model(s), method(s) to identify the presence and extent of statistical heterogeneity, and software package(s) used.                          | Page 2-3                        |
|                               | 13e    | Describe any methods used to explore possible causes of heterogeneity among study results (e.g. subgroup analysis, meta-regression).                                                                                                                                                 | Page 2-3                        |
|                               | 13f    | Describe any sensitivity analyses conducted to assess robustness of the synthesized results.                                                                                                                                                                                         | Page 2-3                        |
| Reporting bias assessment     | 14     | Describe any methods used to assess risk of bias due to missing results in a synthesis (arising from reporting biases).                                                                                                                                                              | NA                              |
| Certainty assessment          | 15     | Describe any methods used to assess certainty (or confidence) in the body of evidence for an outcome.                                                                                                                                                                                | NA                              |
| <b>RESULTS</b>                |        |                                                                                                                                                                                                                                                                                      |                                 |
| Study selection               | 16a    | Describe the results of the search and selection process, from the number of records identified in the search to the number of studies included in the review, ideally using a flow diagram.                                                                                         | Pages 3 to 13                   |
|                               | 16b    | Cite studies that might appear to meet the inclusion criteria, but which were excluded, and explain why they were excluded.                                                                                                                                                          | Suppl. Mat. 3                   |
| Study characteristics         | 17     | Cite each included study and present its characteristics.                                                                                                                                                                                                                            | Table 1                         |
| Risk of bias in studies       | 18     | Present assessments of risk of bias for each included study.                                                                                                                                                                                                                         | Suppl. Mat. 2                   |
| Results of individual studies | 19     | For all outcomes, present, for each study: (a) summary statistics for each group (where appropriate) and (b) an effect estimate and its precision (e.g. confidence/credible interval), ideally using structured tables or plots.                                                     | Figures                         |
| Results of syntheses          | 20a    | For each synthesis, briefly summarise the characteristics and risk of bias among contributing studies.                                                                                                                                                                               | Pages 3 to 13                   |
|                               | 20b    | Present results of all statistical syntheses conducted. If meta-analysis was done, present for each the summary estimate and its precision (e.g. confidence/credible interval) and measures of statistical heterogeneity. If comparing groups, describe the direction of the effect. | Pages 3 to 13                   |
|                               | 20c    | Present results of all investigations of possible causes of heterogeneity among study results.                                                                                                                                                                                       | Pages 3 to                      |

| Section and Topic                              | Item # | Checklist item                                                                                                                                                                                                                             | Location where item is reported |
|------------------------------------------------|--------|--------------------------------------------------------------------------------------------------------------------------------------------------------------------------------------------------------------------------------------------|---------------------------------|
|                                                |        |                                                                                                                                                                                                                                            | 13                              |
|                                                | 20d    | Present results of all sensitivity analyses conducted to assess the robustness of the synthesized results.                                                                                                                                 | Pages 3 to 13                   |
| Reporting biases                               | 21     | Present assessments of risk of bias due to missing results (arising from reporting biases) for each synthesis assessed.                                                                                                                    | NA                              |
| Certainty of evidence                          | 22     | Present assessments of certainty (or confidence) in the body of evidence for each outcome assessed.                                                                                                                                        | NA                              |
| <b>DISCUSSION</b>                              |        |                                                                                                                                                                                                                                            |                                 |
| Discussion                                     | 23a    | Provide a general interpretation of the results in the context of other evidence.                                                                                                                                                          | Pages 13-14                     |
|                                                | 23b    | Discuss any limitations of the evidence included in the review.                                                                                                                                                                            | Pages 13-14                     |
|                                                | 23c    | Discuss any limitations of the review processes used.                                                                                                                                                                                      | Pages 13-14                     |
|                                                | 23d    | Discuss implications of the results for practice, policy, and future research.                                                                                                                                                             | Pages 13-14                     |
| <b>OTHER INFORMATION</b>                       |        |                                                                                                                                                                                                                                            |                                 |
| Registration and protocol                      | 24a    | Provide registration information for the review, including register name and registration number, or state that the review was not registered.                                                                                             | Page 2                          |
|                                                | 24b    | Indicate where the review protocol can be accessed, or state that a protocol was not prepared.                                                                                                                                             | Page 2                          |
|                                                | 24c    | Describe and explain any amendments to information provided at registration or in the protocol.                                                                                                                                            | NA                              |
| Support                                        | 25     | Describe sources of financial or non-financial support for the review, and the role of the funders or sponsors in the review.                                                                                                              | Page 14                         |
| Competing interests                            | 26     | Declare any competing interests of review authors.                                                                                                                                                                                         | Page 14                         |
| Availability of data, code and other materials | 27     | Report which of the following are publicly available and where they can be found: template data collection forms; data extracted from included studies; data used for all analyses; analytic code; any other materials used in the review. | Page 14                         |
| Section and Topic                              | Item # | Checklist item                                                                                                                                                                                                                             | Reported (Yes/No)               |
| <b>TITLE</b>                                   |        |                                                                                                                                                                                                                                            |                                 |
| Title                                          | 1      | Identify the report as a systematic review.                                                                                                                                                                                                | Yes                             |
| <b>BACKGROUND</b>                              |        |                                                                                                                                                                                                                                            |                                 |
| Objectives                                     | 2      | Provide an explicit statement of the main objective(s) or question(s) the review addresses.                                                                                                                                                | Yes                             |
| <b>METHODS</b>                                 |        |                                                                                                                                                                                                                                            |                                 |
| Eligibility criteria                           | 3      | Specify the inclusion and exclusion criteria for the review.                                                                                                                                                                               | Yes                             |



| Section and Topic       | Item # | Checklist item                                                                                                                                                                                                                                                                                        | Location where item is reported |
|-------------------------|--------|-------------------------------------------------------------------------------------------------------------------------------------------------------------------------------------------------------------------------------------------------------------------------------------------------------|---------------------------------|
| Information sources     | 4      | Specify the information sources (e.g. databases, registers) used to identify studies and the date when each was last searched.                                                                                                                                                                        | Yes                             |
| Risk of bias            | 5      | Specify the methods used to assess risk of bias in the included studies.                                                                                                                                                                                                                              | No                              |
| Synthesis of results    | 6      | Specify the methods used to present and synthesise results.                                                                                                                                                                                                                                           | Yes                             |
| <b>RESULTS</b>          |        |                                                                                                                                                                                                                                                                                                       |                                 |
| Included studies        | 7      | Give the total number of included studies and participants and summarise relevant characteristics of studies.                                                                                                                                                                                         | Yes                             |
| Synthesis of results    | 8      | Present results for main outcomes, preferably indicating the number of included studies and participants for each. If meta-analysis was done, report the summary estimate and confidence/credible interval. If comparing groups, indicate the direction of the effect (i.e. which group is favoured). | Yes                             |
| <b>DISCUSSION</b>       |        |                                                                                                                                                                                                                                                                                                       |                                 |
| Limitations of evidence | 9      | Provide a brief summary of the limitations of the evidence included in the review (e.g. study risk of bias, inconsistency and imprecision).                                                                                                                                                           | No                              |
| Interpretation          | 10     | Provide a general interpretation of the results and important implications.                                                                                                                                                                                                                           | Yes                             |
| <b>OTHER</b>            |        |                                                                                                                                                                                                                                                                                                       |                                 |
| Funding                 | 11     | Specify the primary source of funding for the review.                                                                                                                                                                                                                                                 | No                              |
| Registration            | 12     | Provide the register name and registration number.                                                                                                                                                                                                                                                    | No                              |

**Table S1. PRISMA Main Checklist and PRISMA Abstract Checklist**

| Authors                  | Sampling rate <sup>a</sup> | Etiology <sup>b</sup>                                                                                                                                                                                                                                    | MDR <sup>c</sup>        | Source <sup>d</sup>                                                          |
|--------------------------|----------------------------|----------------------------------------------------------------------------------------------------------------------------------------------------------------------------------------------------------------------------------------------------------|-------------------------|------------------------------------------------------------------------------|
| Adler et al. (2020)      | 128/195                    | <i>S. pneumoniae</i> 2                                                                                                                                                                                                                                   | NA                      | NA                                                                           |
| Akagi et al. (2021)      | 266/565                    | <i>S. aureus</i> 34.7%<br><i>Escherichia coli</i> 13%<br><i>S. pneumoniae</i> 8.7%<br><i>Enterococcus</i> spp 8.7%<br><i>Candida</i> spp. 4.3%                                                                                                           | NA                      | Lung 34.8%<br>Soft-tissue infections 17.4%                                   |
| Bardi et al. (2021)      | NA                         | <i>Enterococcus</i> spp. 24<br><i>Coagulase-negative staphylococci</i> 16<br><i>P. aeruginosa</i> 2<br><i>S. aureus</i> 2<br><i>C. albicans</i> 4                                                                                                        | MRSA 2                  | 19 primary BSI and 16 CRBSI                                                  |
| Barry et al. (2021)      | 332/605                    | NA                                                                                                                                                                                                                                                       | NA                      | NA                                                                           |
| Baskaran et al. (2021)   | 220/254                    | <i>Coagulase negative Staphylococcus</i> 13<br><i>Enterococcus</i> spp. 8<br><i>Klebsiella</i> spp. 3<br><i>C. koseri</i> 3<br><i>C. parapsilosis</i> 1<br><i>E. coli</i> 1<br><i>Pseudomonas</i> spp. 1<br><i>S. aureus</i> 1<br><i>H. influenzae</i> 1 | NA                      | NA                                                                           |
| Bayo et al. (2020)       | NA                         | <i>S. epidermidis</i> 38.7%<br><i>E. faecalis</i> 11.4%<br><i>S. aureus</i> 11.4%<br><i>P. aeruginosa</i> 9.1%<br><i>C. albicans</i> 9.1%                                                                                                                | NA                      | Catheter related 45.5%<br>Unknown 27.3%<br>Respiratory 15.9%<br>Urinary 4.5% |
| Blazoski et al. (2021)   | NA                         | NA                                                                                                                                                                                                                                                       | NA                      | NA                                                                           |
| Bonazzetti et al. (2020) | NA                         | <i>Enterococcus</i> spp. 53<br><i>Coagulase-negative</i>                                                                                                                                                                                                 | Gram positive MDR 11.7% | Central line-associated 28<br>Pulmonary (VAP) 13                             |

|                                |         |                                                                                                                                                                                                         |                            |                                                                                                    |
|--------------------------------|---------|---------------------------------------------------------------------------------------------------------------------------------------------------------------------------------------------------------|----------------------------|----------------------------------------------------------------------------------------------------|
|                                |         | staphylococci 24<br><i>S. aureus</i> 9<br>Enterobacterales 19<br><i>Candida</i> spp. 3%                                                                                                                 | Gram negative MDR<br>75.8% | Unknown 52                                                                                         |
| <b>Buehler et al. (2021)</b>   | NA      | <i>Citrobacter</i> spp. 2<br><i>Enterococcus</i> spp. 7<br><i>K. aerogenes</i> 1<br><i>K. Pneumoniae</i> 1<br><i>Moraxella</i> spp. 1<br><i>Candida glabrata</i> 1<br><i>P. aeruginosa</i> 1            | NA                         | NA                                                                                                 |
| <b>Buetti et al. (2021)</b>    | NA      | Coagulase-negative<br>Staphylococci 14<br><i>S. aureus</i> 3<br><i>Enterococcus</i> spp. 4<br>Enterobacterales 5<br><i>P. aeruginosa</i> 5<br><i>C. albicans</i> 4                                      |                            | Intra-abdominal 1<br>Skin/soft tissue 2<br>CRBSI 8<br>Pulmonary 8<br>Urinary tract 1<br>Unknown 18 |
| <b>Cataldo et al. (2020)</b>   | NA      | <i>P. aeruginosa</i> 7<br><i>E. faecalis</i> 3<br><i>E. faecium</i> 6<br><i>K. pneumoniae</i> 1<br><i>E. coli</i> 1<br><i>Candida</i> spp. 6                                                            | VRE 2<br>ESBL 2            | NA                                                                                                 |
| <b>Chen et al. (2020)</b>      | 239/408 | <i>Stenotrophomonas maltophilia</i> 3<br><i>Enterococcus faecium</i> 2<br><i>Enterococcus faecalis</i> 1<br><i>Pediococcus lactis</i> 1<br><i>Bacteroides ovatus</i> 1<br><i>Candida parapsilosis</i> 1 | NA                         | NA                                                                                                 |
| <b>Contou et al. (2020)</b>    | 80/92   | <i>S. aureus</i> 1                                                                                                                                                                                      | NA                         | NA                                                                                                 |
| <b>D'Onofrio et al. (2020)</b> | 110/110 | <i>S. hominis</i> 1<br><i>C. aurimucosum</i> 1                                                                                                                                                          | NA                         | Pulmonary 1<br>No focus 2                                                                          |

|                            |         |                               |    |                                                                                     |
|----------------------------|---------|-------------------------------|----|-------------------------------------------------------------------------------------|
| Engsbro et al. (2020)      | 190/227 | <i>S. pyogenes</i> 1          | NA | Intravascular catheter related 12<br>Pulmonary infection or catheter 3<br>Unknown 2 |
|                            |         | Coagulase-negative            |    |                                                                                     |
|                            |         | <i>Staphylococci</i> 4        |    |                                                                                     |
|                            |         | <i>S. aureus</i> 2            |    |                                                                                     |
|                            |         | <i>Enterococcus faecium</i> 6 |    |                                                                                     |
|                            |         | <i>Enterobacter</i> spp. 1    |    |                                                                                     |
|                            |         | <i>Klebsiella</i> spp. 1      |    |                                                                                     |
|                            |         | <i>E. coli</i> 1              |    |                                                                                     |
|                            |         | <i>C. albicans</i> 2          |    |                                                                                     |
|                            |         | <i>C. glabrata</i> 1          |    |                                                                                     |
|                            |         | <i>C. parapsilosis</i> 1      |    |                                                                                     |
| Garcia-Vidal et al. (2021) | 267/989 | Coagulase-negative            | NA |                                                                                     |
|                            |         | <i>staphylococci</i> 7        |    |                                                                                     |
|                            |         | <i>P. aeruginosa</i> 3        |    |                                                                                     |
|                            |         | <i>E. faecium</i> 3           |    |                                                                                     |
|                            |         | <i>E. coli</i> 2              |    |                                                                                     |
|                            |         | <i>S. anginosus</i> 1         |    |                                                                                     |
|                            |         | <i>C. albicans</i> 2          |    |                                                                                     |

|                                         |       |                                                                                                                                                                                                                                                                                      |    |                                                                                                                |
|-----------------------------------------|-------|--------------------------------------------------------------------------------------------------------------------------------------------------------------------------------------------------------------------------------------------------------------------------------------|----|----------------------------------------------------------------------------------------------------------------|
| <b>Giacobbe et al.<br/>(2020)</b>       | 78/78 | <i>E. aerogenes</i> 4<br><i>E. coli</i> 1<br>Coagulase-negative<br>staphylococci 11<br><i>S. aureus</i> 6<br>Viridans group<br>streptococci 3<br><i>Enterococcus</i> spp. 12<br><i>P. aeruginosa</i> 2<br><i>P. mirabilis</i> 1<br><i>Candida</i> spp. 3<br><i>Prevotella</i> spp. 1 |    | Lower respiratory tract<br>10/45<br>Urinary tract 2/45<br>Catheter-related 4/45<br>Unknown 29/45<br>(episodes) |
| <b>Gidaro et al.<br/>(2020)</b>         | NA    | Gram + 11<br>Gram - 3<br>Fungi 1                                                                                                                                                                                                                                                     | NA | Catheter-related 15                                                                                            |
| <b>Girona-Alarcon et al.<br/>(2020)</b> | NA    | <i>S. epidermidis</i> 5<br><i>K. pneumoniae</i> 1<br><i>C. albicans</i> 1                                                                                                                                                                                                            | NA | Central line associated 7                                                                                      |
| <b>Grasselli et al.<br/>(2021)</b>      | NA    | <i>S. aureus</i> 37<br><i>Enterococcus</i><br>spp. 63<br>Coagulase- negative<br>staphylococci 30<br><i>S. pneumoniae</i> 1<br><i>P. aeruginosa</i> 23<br>Enterobacterales 43<br><i>Klebsiella</i> spp. 16<br><i>E. coli</i> 10                                                       | NA | Catheter-related 28%                                                                                           |

|                               |               |                                                                                                                                      |                                                                                |                                                                                                                                                                                                                                                                                      |
|-------------------------------|---------------|--------------------------------------------------------------------------------------------------------------------------------------|--------------------------------------------------------------------------------|--------------------------------------------------------------------------------------------------------------------------------------------------------------------------------------------------------------------------------------------------------------------------------------|
|                               |               | <i>A. baumannii</i> 15                                                                                                               |                                                                                |                                                                                                                                                                                                                                                                                      |
| <b>Haedo et al. (2020)</b>    | 53/53         | NA                                                                                                                                   | NA                                                                             | NA                                                                                                                                                                                                                                                                                   |
| <b>Hughes et al. (2020)</b>   | 643/836 (77%) | Enterobacterales 8<br><i>S. aureus</i> 1<br><i>P. aeruginosa</i> 1<br><i>C. albicans</i> 3 (isolates)                                |                                                                                | Central line- associated 3/22,<br>Respiratory 2/22,<br>Urinary tract infections 6/22,<br>Skin and soft tissue infections 3/22,<br>Pelvic inflammatory disease 1/22,<br>Post-partum infection 1/22,<br>Gastrointestinal translocation 1/22,<br>Upper respiratory tract infection 1/22 |
| <b>Karaba et al. (2020)</b>   | 637/1016      | <i>S. aureus</i> 6<br>Coagulase-negative Staphylococci 5<br><i>Enterococcus spp.</i> 1<br><i>E. coli</i> 5<br><i>K. pneumoniae</i> 2 | MRSA 4                                                                         | Urinary tract 6<br>Catheter-related 1<br>Gastrointestinal 1<br>Respiratory 1<br>Skin and soft tissue infection 2<br>Unknown 9<br>Other 1                                                                                                                                             |
| <b>Karami et al. (2021)</b>   | 711/925       | <i>S. pneumoniae</i> 1<br><i>S. aureus</i> 1<br><i>E. coli</i> 2                                                                     | NA                                                                             | Pneumonia 1<br>Cellulitis 1<br>Urinary tract 1<br>Primary bacteremia 1                                                                                                                                                                                                               |
| <b>Karruli et al. (2021)</b>  | NA            | NA                                                                                                                                   | Infections reported only if caused by MDR                                      | NA                                                                                                                                                                                                                                                                                   |
| <b>Kokkoris et al. (2021)</b> | NA            | <i>A. Baumannii</i> 7<br><i>K. pneumoniae</i> 4<br><i>Enterococcus spp.</i> 6                                                        | XDR <i>A. baumannii</i> 4<br>PDR <i>A. baumannii</i> 3<br><i>K. pneumoniae</i> | NA                                                                                                                                                                                                                                                                                   |

|                               |         |                                                                                          |                                        |                                                                                        |
|-------------------------------|---------|------------------------------------------------------------------------------------------|----------------------------------------|----------------------------------------------------------------------------------------|
|                               |         | <i>C. albicans</i> 4                                                                     | carbapenemase-positive                 |                                                                                        |
|                               |         | <i>C. parapsilosis</i> 3                                                                 | 4                                      |                                                                                        |
| Kumar et al. (2020)           | NA      | <i>S. aureus</i> 10                                                                      | MRSA 5                                 | NA                                                                                     |
|                               |         | <i>S. hominis</i> 1                                                                      |                                        |                                                                                        |
|                               |         | <i>S. epidermidis</i> 4                                                                  |                                        |                                                                                        |
|                               |         | Group D <i>Streptococcus</i>                                                             |                                        |                                                                                        |
|                               |         | 5                                                                                        |                                        |                                                                                        |
|                               |         | <i>E. coli</i> 5                                                                         |                                        |                                                                                        |
|                               |         | <i>Klebsiella</i> spp. 2                                                                 |                                        |                                                                                        |
|                               |         | <i>Pseudomonas</i> spp. 7                                                                |                                        |                                                                                        |
|                               |         | <i>Serratia</i> spp. 2                                                                   |                                        |                                                                                        |
|                               |         | <i>Enterobacter</i> spp. 3                                                               |                                        |                                                                                        |
|                               |         | <i>Proteus</i> spp. 2                                                                    |                                        |                                                                                        |
|                               |         | <i>Stenotrophomonas</i> spp.                                                             |                                        |                                                                                        |
|                               |         | 1                                                                                        |                                        |                                                                                        |
|                               |         | <i>Candida</i> spp. 11                                                                   |                                        |                                                                                        |
| Lardaro et al. (2021)         | 395/542 | <i>S. epidermidis</i> 2                                                                  | Methicillin-resistance <i>S.</i>       | NA                                                                                     |
|                               |         | <i>E. faecalis</i> 2                                                                     | <i>epidermidis</i> 1                   |                                                                                        |
|                               |         | <i>Aerococcus</i> spp. 1                                                                 |                                        |                                                                                        |
|                               |         | <i>Globicatella</i> 1                                                                    |                                        |                                                                                        |
|                               |         | <i>C. striatum</i> 1                                                                     |                                        |                                                                                        |
|                               |         | <i>S. pettenkoferi</i> 1                                                                 |                                        |                                                                                        |
|                               |         | <i>Acinetobacter</i> 1                                                                   |                                        |                                                                                        |
| Lendorf (2020)                | NA      | <i>C. albicans</i>                                                                       | NA                                     | NA                                                                                     |
| Martinez-Guerra et al. (2021) | NA      | Coagulase negative                                                                       | AmpC producers) 5                      | NA                                                                                     |
|                               |         | staphylococci 14                                                                         | ESBL producers 1                       |                                                                                        |
|                               |         | <i>Enterobacter</i> complex 7                                                            | MDR <i>P. Aeruginosa</i> 1             |                                                                                        |
|                               |         | <i>Enterococcus</i> spp 6                                                                | Azole resistant <i>Candida</i>         |                                                                                        |
|                               |         | <i>P. aeruginosa</i> 3                                                                   | 5                                      |                                                                                        |
|                               |         | Other 5                                                                                  |                                        |                                                                                        |
| Nori et al. (2021)            | 152/152 | <i>S. aureus</i> 30%,<br><i>S. epidermidis</i> 12%,<br><i>Streptococcus</i> spp.<br>10%, | Gram-negative MDR 7,<br>of which CRE 4 | Catheter related 23%;<br>respiratory 13%;<br>genitourinary 9%;<br>gastrointestinal 6%; |

|                       |                           |                                                                                                                                                                                                                                                           |                                                                                                                                                                                                                                          |                                                                                          |
|-----------------------|---------------------------|-----------------------------------------------------------------------------------------------------------------------------------------------------------------------------------------------------------------------------------------------------------|------------------------------------------------------------------------------------------------------------------------------------------------------------------------------------------------------------------------------------------|------------------------------------------------------------------------------------------|
|                       |                           | <i>Enterococcus</i> spp. 7%,<br><i>E. coli</i> 7%,<br><i>P. aeruginosa</i> 6%,<br><i>Candida</i> spp. 5%,<br><i>Klebsiella</i> spp. 3%,<br><i>Enterobacter</i> spp. 3%<br><i>Candida</i> spp. 5%                                                          |                                                                                                                                                                                                                                          | multiple 30%<br>oropharyngeal 2%<br>skin 2%<br>other 2 %<br>unknown 6%                   |
| Ripa et al. (2021)    | NA                        | <i>E. coli</i> 5;<br><i>K. pneumoniae</i> 1;<br><i>S. aureus</i> 2;<br><i>E. faecalis</i> 6;<br><i>E. faecium</i> 3;<br><i>A. baumannii</i> 5;<br><i>P. aeruginosa</i> 3;<br><i>C. albicans</i> 5<br>coagulase-negative<br>staphylococci 53               | MRSA 1;<br>VRE 4;<br>3°-gen cephalosporin-<br>resistant <i>E. cloacae</i> 2;<br>3°-gen cephalosporin-<br>resistant <i>E. coli</i> 4;<br>carbapenem-resistant<br><i>A. baumannii</i> 7;<br>carbapenem-resistant<br><i>P. aeruginosa</i> 2 | NA                                                                                       |
| Rothe et al. (2021)   | 118/140<br>(57 follow-up) | <i>E. coli</i> 2,<br><i>S. aureus</i> 1,<br><i>S. epidermidis</i> 2<br><i>K. oxytoca</i> 1,<br><i>K. pneumoniae</i> 1<br><i>P. aeruginosa</i> 1<br><i>S. epidermidis</i> 4<br><i>C. albicans</i> 2,<br><i>Enterococcus</i> spp. 3<br><i>K. varicola</i> 1 | VRE 2                                                                                                                                                                                                                                    | NA                                                                                       |
| Søgaard et al. (2021) | 127/162                   | <i>S. epidermidis</i> 1<br><i>E. coli</i> 1<br><i>C. koseri</i> 1<br><i>P. aeruginosa</i> 1<br><i>S. pneumoniae</i> 1<br><i>C. albicans</i> 1                                                                                                             | No MDR among BSI                                                                                                                                                                                                                         | Catheter-associated 2<br>Pulmonary 1<br>Urinary tract 1<br>Unknown 1<br>Primary CA BSI 1 |
| Soriano et al. (2021) | NA                        | NA                                                                                                                                                                                                                                                        | NA                                                                                                                                                                                                                                       | Primary 28                                                                               |



|                                 |           |                                                                                                                                                                           |        |                                                                 |
|---------------------------------|-----------|---------------------------------------------------------------------------------------------------------------------------------------------------------------------------|--------|-----------------------------------------------------------------|
|                                 |           |                                                                                                                                                                           |        | Catheter-related 7                                              |
| Suarez de la Rica et al. (2021) | NA        | <i>Enterococcus</i> spp. 19<br><i>Klebsiella</i> spp. 5<br><i>P. aeruginosa</i> 2<br><i>Candida</i> spp. 12<br><i>S. aureus</i> 6<br><i>E. coli</i> 4                     | NA     | NA                                                              |
| Thelen et al. (2021)            | 678/678   | <i>E. coli</i> 2<br><i>K. pneumoniae</i> 1<br><i>P. aeruginosa</i> 1<br><i>S. pneumoniae</i> 2<br><i>S. aureus</i> 1                                                      | NA     | NA                                                              |
| Vaughn et al. (2020)            | 1063/1705 | NA                                                                                                                                                                        | NA     | NA                                                              |
| Wang et al. (2021)              | 969/1396  | <i>E. coli</i> 2<br><i>K. pneumoniae</i> 1<br><i>K. variicola</i> 1<br><i>Proteus mirabilis</i> 4<br><i>S. aureus</i> 2<br><i>S. epidermidis</i> 1                        | MRSA 1 | Urinary tract 6<br>Central venous access related 1<br>Unclear 5 |
| Zhang et al. (2020)             | NA        | <i>S. haemolyticus</i> 2<br><i>C. albicans</i> 4<br><i>Cryptococcus</i> spp. 1<br><i>T. asahii</i> 1<br><i>E. coli</i> 2<br><i>E. faecium</i> 1<br><i>K. pneumoniae</i> 3 |        | NA                                                              |

**Table S2. Characteristics of bloodstream infections and isolates**

The table shows the main characteristics of the bloodstream infections and microbiological isolates.

<sup>a</sup> The column “sampling rate” shows the proportion of patients tested with a blood culture on the total number of included patients, as reported by the authors, when available.

<sup>b</sup> The column “etiology” shows the microbiological characteristics of the isolates, as reported by the authors, when available.

<sup>c</sup> The column “MDR” shows the number or percentage and the types of multidrug resistant microorganisms grown in the cultures, when available.

<sup>d</sup> The column “source” shows the diagnosed or suspected source of the bloodstream infection, presented as number of cases when available, or percentages.

BSI, bloodstream infection; CRBI, catheter-related bloodstream infection; CRE, Carbapenem-Resistant Enterobacteriaceae; ESBL, extended-spectrum beta-lactamase; ICU, intensive care unit; MDR, Multi-Drug Resistance; MRSA, Methicillin-Resistant Staphylococcus Aureus; NA, not available; PDR, pandrug-resistant ; VAP, Ventilator-associated pneumonia; VRE, Vancomycin-Resistant Enterococcus; XDR, extensively drug-resistant.

| Authors<br>(year)                 | Aim of the<br>study              | Inclusion of<br>consecutive<br>patients | Prospective<br>collection of<br>data | Endpoint<br>appropriate<br>to the study<br>aim | Unbiased<br>evaluation<br>of<br>endpoints | Follow up<br>period<br>appropriate<br>to the major<br>endpoint | Loss to<br>follow up<br>not<br>exceeding<br>5% | Sample<br>calculation | Score |
|-----------------------------------|----------------------------------|-----------------------------------------|--------------------------------------|------------------------------------------------|-------------------------------------------|----------------------------------------------------------------|------------------------------------------------|-----------------------|-------|
| <b>Adler et al.<br/>(2020)</b>    | 2<br>Reported<br>and<br>adequate | 2<br>Reported and<br>adequate           | 1*<br>No protocol<br>registration    | 2<br>Reported<br>and<br>adequate               | 2<br>Reported<br>and<br>adequate          | 2<br>Reported and<br>adequate                                  | 2<br>Reported<br>and<br>adequate               | 0<br>Not reported     | 13/10 |
| <b>Akagi et al.<br/>(2021)</b>    | 2<br>Reported<br>and<br>adequate | 2<br>Reported and<br>adequate           | 1*<br>No protocol<br>registration    | 2<br>Reported<br>and<br>adequate               | 2<br>Reported<br>and<br>adequate          | 2<br>Reported and<br>adequate                                  | 2<br>Reported<br>and<br>adequate               | 0<br>Not reported     | 13/18 |
| <b>Bardi et al.<br/>(2021)</b>    | 2<br>Reported<br>and<br>adequate | 2<br>Reported and<br>adequate           | 1*<br>No protocol<br>registration    | 2<br>Reported<br>and<br>adequate               | 2<br>Reported<br>and<br>adequate          | 2<br>Reported and<br>adequate                                  | 2<br>Reported<br>and<br>adequate               | 0<br>Not reported     | 13/16 |
| <b>Barry et al.<br/>(2021)</b>    | 2<br>Reported<br>and<br>adequate | 2<br>Reported and<br>adequate           | 1*<br>No protocol<br>registration    | 2<br>Reported<br>and<br>adequate               | 2<br>Reported<br>and<br>adequate          | 2<br>Reported and<br>adequate                                  | 2<br>Reported<br>and<br>adequate               | 0<br>Not reported     | 13/16 |
| <b>Baskaran<br/>et al. (2021)</b> | 2<br>Reported<br>and             | 2<br>Reported and<br>adequate           | 1*<br>No protocol<br>registration    | 2<br>Reported<br>and                           | 2<br>Reported<br>and                      | 2<br>Reported and<br>adequate                                  | 2<br>Reported<br>and                           | 0<br>Not reported     | 13/16 |

|                                 | adequate                   |                                                                                                                                                                                                   |                                | adequate                   | adequate                   |                            | adequate                   |                   |       |
|---------------------------------|----------------------------|---------------------------------------------------------------------------------------------------------------------------------------------------------------------------------------------------|--------------------------------|----------------------------|----------------------------|----------------------------|----------------------------|-------------------|-------|
| <b>Bayo et al. (2020)</b>       | 2<br>Reported and adequate | 1*<br>Participating sites entered data for either: all identified patients, or a random selection of at least ten patients from across their eligible cohort. Random sampling wasn't standardized | 1*<br>No protocol registration | 2<br>Reported and adequate | 2<br>Reported and adequate | 2<br>Reported and adequate | 2<br>Reported and adequate | 0<br>Not reported | 12/16 |
| <b>Blazoski et al. (2021)</b>   | 2<br>Reported and adequate | 2<br>Reported and adequate                                                                                                                                                                        | 1*<br>No protocol registration | 2<br>Reported and adequate | 2<br>Reported and adequate | 2<br>Reported and adequate | 2<br>Reported and adequate | 0<br>Not reported | 13/16 |
| <b>Bonazzetti et al. (2020)</b> | 2<br>Reported and adequate | 2<br>Reported and adequate                                                                                                                                                                        | 1*<br>No protocol registration | 2<br>Reported and adequate | 2<br>Reported and adequate | 2<br>Reported and adequate | 2<br>Reported and adequate | 0<br>Not reported | 13/10 |
| <b>Buehler et al. (2021)</b>    | 2<br>Reported and adequate | 2<br>Reported and adequate                                                                                                                                                                        | 1*<br>No protocol registration | 2<br>Reported and adequate | 2<br>Reported and adequate | 2<br>Reported and adequate | 2<br>Reported and adequate | 0<br>Not reported | 13/16 |
| <b>Buetti et al. (2021)</b>     | 2<br>Reported and adequate | 2<br>Reported and adequate                                                                                                                                                                        | 1*<br>No protocol registration | 2<br>Reported and adequate | 2<br>Reported and adequate | 2<br>Reported and adequate | 2<br>Reported and adequate | 0<br>Not reported | 13/16 |

|                                   |                            |                            |                                                        |                            |                            |                                                                        |                            |                   |       |
|-----------------------------------|----------------------------|----------------------------|--------------------------------------------------------|----------------------------|----------------------------|------------------------------------------------------------------------|----------------------------|-------------------|-------|
| <b>Cataldo et al. (2020)</b>      | 2<br>Reported and adequate | 2<br>Reported and adequate | 1*<br>No protocol registration                         | 2<br>Reported and adequate | 2<br>Reported and adequate | 2<br>Reported and adequate                                             | 2<br>Reported and adequate | 0<br>Not reported | 13/16 |
| <b>Cates et al. (2020)</b>        | 2<br>Reported and adequate | 2<br>Reported and adequate | 1*<br>No protocol registration                         | 2<br>Reported and adequate | 2<br>Reported and adequate | 2<br>Reported and adequate                                             | 2<br>Reported and adequate | 0<br>Not reported | 13/16 |
| <b>Chen et al. (2020)</b>         | 2<br>Reported and adequate | 2<br>Reported and adequate | 1*<br>No protocol registration                         | 2<br>Reported and adequate | 2<br>Reported and adequate | 2<br>Reported and adequate                                             | 2<br>Reported and adequate | 0<br>Not reported | 13/16 |
| <b>Cheng et al. (2020)</b>        | 2<br>Reported and adequate | 2<br>Reported and adequate | 1*<br>No protocol registration                         | 2<br>Reported and adequate | 2<br>Reported and adequate | 2<br>Reported and adequate                                             | 2<br>Reported and adequate | 0<br>Not reported | 13/16 |
| <b>Contou et al. (2020)</b>       | 2<br>Reported and adequate | 2<br>Reported and adequate | 1*<br>No protocol registration                         | 2<br>Reported and adequate | 2<br>Reported and adequate | 2<br>Reported and adequate                                             | 2<br>Reported and adequate | 0<br>Not reported | 13/16 |
| <b>D'Onofrio et al. (2020)</b>    | 2<br>Reported and adequate | 2<br>Reported and adequate | 1*<br>Secondary analysis of part of a registered study | 2<br>Reported and adequate | 2<br>Reported and adequate | 1*<br>The follow up does not include the whole hospitalization period. | 2<br>Reported and adequate | 0<br>Not reported | 12/16 |
| <b>Engsbro et al. (2020)</b>      | 2<br>Reported and adequate | 2<br>Reported and adequate | 1*<br>No protocol registration                         | 2<br>Reported and adequate | 2<br>Reported and adequate | 2<br>Reported and adequate                                             | 2<br>Reported and adequate | 0<br>Not reported | 13/16 |
| <b>Fakih et al. (2021)</b>        | 2<br>Reported and adequate | 2<br>Reported and adequate | 1*<br>No protocol registration                         | 2<br>Reported and adequate | 2<br>Reported and adequate | 2<br>Reported and adequate                                             | 2<br>Reported and adequate | 0<br>Not reported | 13/16 |
| <b>Garcia-Vidal et al. (2021)</b> | 2<br>Reported and          | 2<br>Reported and adequate | 1*<br>No protocol registration                         | 2<br>Reported and          | 2<br>Reported and          | 2<br>Reported and adequate                                             | 2<br>Reported and          | 0<br>Not reported | 13/16 |

|                                     | adequate                   |                            |                                | adequate                   | adequate                   |                               | adequate                   |                   |       |
|-------------------------------------|----------------------------|----------------------------|--------------------------------|----------------------------|----------------------------|-------------------------------|----------------------------|-------------------|-------|
| <b>Giacobbe et al. (2020)</b>       | 2<br>Reported and adequate | 2<br>Reported and adequate | 1*<br>No protocol registration | 2<br>Reported and adequate | 2<br>Reported and adequate | 2<br>Reported and adequate    | 2<br>Reported and adequate | 0<br>Not reported | 13/16 |
| <b>Gidaro et al. (2020)</b>         | 2<br>Reported and adequate | 2<br>Reported and adequate | 1*<br>No protocol registration | 2<br>Reported and adequate | 2<br>Reported and adequate | 2<br>Reported and adequate    | 2<br>Reported and adequate | 0<br>Not reported | 13/16 |
| <b>Girona-Alarcon et al. (2020)</b> | 2<br>Reported and adequate | 2<br>Reported and adequate | 1*<br>No protocol registration | 2<br>Reported and adequate | 2<br>Reported and adequate | 2<br>Reported and adequate    | 2<br>Reported and adequate | 0<br>Not reported | 13/16 |
| <b>Grasselli et al. (2021)</b>      | 2<br>Reported and adequate | 2<br>Reported and adequate | 2<br>Reported and adequate     | 2<br>Reported and adequate | 2<br>Reported and adequate | 2<br>Reported and adequate    | 2<br>Reported and adequate | 0<br>Not reported | 14/16 |
| <b>Haedo et al. (2020)</b>          | 2<br>Reported and adequate | 2<br>Reported and adequate | 1*<br>No protocol registration | 2<br>Reported and adequate | 2<br>Reported and adequate | 2<br>Reported and adequate    | 2<br>Reported and adequate | 0<br>Not reported | 13/16 |
| <b>Hughes et al. (2020)</b>         | 2<br>Reported and adequate | 2<br>Reported and adequate | 1*<br>No protocol registration | 2<br>Reported and adequate | 2<br>Reported and adequate | 1*<br>Median follow up 6 days | 2<br>Reported and adequate | 0<br>Not reported | 12/16 |
| <b>Karaba et al. (2020)</b>         | 2<br>Reported and adequate | 2<br>Reported and adequate | 1*<br>No protocol registration | 2<br>Reported and adequate | 2<br>Reported and adequate | 2<br>Reported and adequate    | 2<br>Reported and adequate | 0<br>Not reported | 13/16 |
| <b>Karami et al. (2021)</b>         | 2<br>Reported and adequate | 2<br>Reported and adequate | 1*<br>No protocol registration | 2<br>Reported and adequate | 2<br>Reported and adequate | 2<br>Reported and adequate    | 2<br>Reported and adequate | 0<br>Not reported | 13/16 |
| <b>Karruli et al. (2021)</b>        | 2<br>Reported              | 2<br>Reported and          | 1*<br>No protocol              | 2<br>Reported              | 2<br>Reported              | 2<br>Reported and             | 2<br>Reported              | 0<br>Not reported | 13/16 |

|                                      | and<br>adequate            | adequate                   | registration                   | and<br>adequate            | and<br>adequate            | adequate                   | and<br>adequate              |                   |       |
|--------------------------------------|----------------------------|----------------------------|--------------------------------|----------------------------|----------------------------|----------------------------|------------------------------|-------------------|-------|
| <b>Kokkoris et al. (2021)</b>        | 2<br>Reported and adequate | 2<br>Reported and adequate | 1*<br>No protocol registration | 2<br>Reported and adequate | 2<br>Reported and adequate | 2<br>Reported and adequate | 2<br>Reported and adequate   | 0<br>Not reported | 13/16 |
| <b>Kumar et al. (2020)</b>           | 2<br>Reported and adequate | 2<br>Reported and adequate | 1*<br>No protocol registration | 2<br>Reported and adequate | 2<br>Reported and adequate | 2<br>Reported and adequate | 2<br>Reported and adequate   | 0<br>Not reported | 13/16 |
| <b>Lardaro et al. (2021)</b>         | 2<br>Reported and adequate | 2<br>Reported and adequate | 1*<br>No protocol registration | 2<br>Reported and adequate | 2<br>Reported and adequate | 2<br>Reported and adequate | 2<br>Reported and adequate   | 0<br>Not reported | 13/16 |
| <b>Lendorf (2020)</b>                | 2<br>Reported and adequate | 2<br>Reported and adequate | 1*<br>No protocol registration | 2<br>Reported and adequate | 2<br>Reported and adequate | 2<br>Reported and adequate | 2<br>Reported and adequate   | 0<br>Not reported | 13/16 |
| <b>Marcus et al. (2021)</b>          | 2<br>Reported and adequate | 2<br>Reported and adequate | 1*<br>No protocol registration | 2<br>Reported and adequate | 2<br>Reported and adequate | 2<br>Reported and adequate | 2<br>Reported and adequate   | 0<br>Not reported | 13/16 |
| <b>Martinez-Guerra et al. (2021)</b> | 2<br>Reported and adequate | 2<br>Reported and adequate | 1*<br>No protocol registration | 2<br>Reported and adequate | 2<br>Reported and adequate | 2<br>Reported and adequate | 1*<br>Loss to follow up > 5% | 0<br>Not reported | 12/16 |
| <b>Nori et al. (2021)</b>            | 2<br>Reported and adequate | 2<br>Reported and adequate | 1*<br>No protocol registration | 2<br>Reported and adequate | 2<br>Reported and adequate | 2<br>Reported and adequate | 2<br>Reported and adequate   | 0<br>Not reported | 13/16 |
| <b>Ripa et al. (2021)</b>            | 2<br>Reported and adequate | 2<br>Reported and adequate | 2<br>Reported and adequate     | 2<br>Reported and adequate | 2<br>Reported and adequate | 2<br>Reported and adequate | 2<br>Reported and adequate   | 0<br>Not reported | 14/16 |
| <b>Rothe et al. (2021)</b>           | 2<br>Reported              | 2<br>Reported and          | 1*<br>No protocol              | 2<br>Reported              | 2<br>Reported              | 2<br>Reported and          | 2<br>Reported                | 0<br>Not reported | 13/16 |

|                                        | and<br>adequate            | adequate                                                                                                                                                                                                          | registration                   | and<br>adequate            | and<br>adequate            | adequate                   | and<br>adequate            |                   |       |
|----------------------------------------|----------------------------|-------------------------------------------------------------------------------------------------------------------------------------------------------------------------------------------------------------------|--------------------------------|----------------------------|----------------------------|----------------------------|----------------------------|-------------------|-------|
| <b>Søgaard et al. (2021)</b>           | 2<br>Reported and adequate | 2<br>Reported and adequate                                                                                                                                                                                        | 1*<br>No protocol registration | 2<br>Reported and adequate | 2<br>Reported and adequate | 2<br>Reported and adequate | 2<br>Reported and adequate | 0<br>Not reported | 13/16 |
| <b>Soriano et al. (2021)</b>           | 2<br>Reported and adequate | 2<br>Reported and adequate                                                                                                                                                                                        | 1*<br>No protocol registration | 2<br>Reported and adequate | 2<br>Reported and adequate | 2<br>Reported and adequate | 2<br>Reported and adequate | 0<br>Not reported | 13/16 |
| <b>Suarez de la Rica et al. (2021)</b> | 2<br>Reported and adequate | 2<br>Reported and adequate                                                                                                                                                                                        | 1*<br>No protocol registration | 2<br>Reported and adequate | 2<br>Reported and adequate | 2<br>Reported and adequate | 2<br>Reported and adequate | 0<br>Not reported | 13/16 |
| <b>Thelen et al. (2021)</b>            | 2<br>Reported and adequate | 2<br>Reported and adequate                                                                                                                                                                                        | 1*<br>No protocol registration | 2<br>Reported and adequate | 2<br>Reported and adequate | 2<br>Reported and adequate | 2<br>Reported and adequate | 0<br>Not reported | 13/16 |
| <b>Vaughn et al. (2020)</b>            | 2<br>Reported and adequate | 1*<br>Hospitals unable to abstract all cases followed a pseudo-randomization procedure (in which daily eligible cases were sorted by time stamp of discharge and included in order of smallest minute value until | 1*<br>No protocol registration | 2<br>Reported and adequate | 2<br>Reported and adequate | 2<br>Reported and adequate | 2<br>Reported and adequate | 0<br>Not reported | 12/16 |

|                                            |                               |                               | abstraction<br>capacity was<br>reached) |                               |                               |                               |                                    |                   |       |
|--------------------------------------------|-------------------------------|-------------------------------|-----------------------------------------|-------------------------------|-------------------------------|-------------------------------|------------------------------------|-------------------|-------|
| <b>Wang et al.<br/>(2021)</b>              | 2<br>Reported and<br>adequate | 2<br>Reported and<br>adequate | 1*<br>No protocol<br>registration       | 2<br>Reported and<br>adequate | 2<br>Reported and<br>adequate | 2<br>Reported and<br>adequate | 1*<br>Loss to<br>follow up ><br>5% | 0<br>Not reported | 12/16 |
| <b>Wendel<br/>Garcia et<br/>al. (2020)</b> | 2<br>Reported and<br>adequate | 2<br>Reported and<br>adequate | 1*<br>No protocol<br>registration       | 2<br>Reported and<br>adequate | 2<br>Reported and<br>adequate | 2<br>Reported and<br>adequate | 2<br>Reported and<br>adequate      | 0<br>Not reported | 13/16 |
| <b>Zhang et<br/>al. (2020)</b>             | 2<br>Reported and<br>adequate | 2<br>Reported and<br>adequate | 1*<br>No protocol<br>registration       | 2<br>Reported and<br>adequate | 2<br>Reported and<br>adequate | 2<br>Reported and<br>adequate | 2<br>Reported and<br>adequate      | 0<br>Not reported | 13/16 |
| <b>Zhou et al.<br/>(2020)</b>              | 2<br>Reported and<br>adequate | 2<br>Reported and<br>adequate | 1*<br>No protocol<br>registration       | 2<br>Reported and<br>adequate | 2<br>Reported and<br>adequate | 2<br>Reported and<br>adequate | 2<br>Reported and<br>adequate      | 0<br>Not reported | 13/16 |

**Table S3. Quality assessment of studies according to MINORS score for non-comparative studies.**

Qualitative assessment was performed using the MINORS score. The eight items are scored 0 (not reported), 1 (reported but inadequate) or 2 (reported and adequate). The global ideal score being 16 for non-comparative studies.

\* For the domains judged as 'reported but inadequate', the table provides a brief explanation of the detected reason for inadequacy. Please also see the additional score for comparative studies at Table S3



|                                | <b>An adequate control group</b> | <b>Contemporary groups</b> | <b>Baseline equivalence of groups</b>                      | <b>Adequate statistical analyses</b> | <b>Additional score for comparative studies</b> |
|--------------------------------|----------------------------------|----------------------------|------------------------------------------------------------|--------------------------------------|-------------------------------------------------|
| <b>Bayo et al. (2020)</b>      | 2<br>Reported and adequate       | 1*<br>Historical cohort    | 1*<br>Potential confounders among baseline characteristics | 1*<br>Unadjusted analysis            | 5/8                                             |
| <b>Buetti et al. (2021)</b>    | 2<br>Reported and adequate       | 1*<br>Historical cohort    | 2<br>Reported and adequate                                 | 2<br>Reported and adequate           | 7/8                                             |
| <b>Cataldo et al. (2020)</b>   | 2<br>Reported and adequate       | 1*<br>Historical cohort    | 1*<br>Potential confounders among baseline characteristics | 1*<br>Unadjusted analysis            | 5/8                                             |
| <b>Cates et al. (2020)</b>     | 2<br>Reported and adequate       | 1*<br>Historical cohort    | 1*<br>Potential confounders among baseline characteristics | 2<br>Reported and adequate           | 6/8                                             |
| <b>D'Onofrio et al. (2020)</b> | 2<br>Reported and adequate       | 1*<br>Historical cohort    | 1*<br>Potential confounders among baseline characteristics | 1*<br>Unadjusted analysis            | 5/8                                             |
| <b>Engsbro et al. (2020)</b>   | 2<br>Reported and adequate       | 2<br>Reported and adequate | 1*<br>Potential confounders among baseline characteristics | 1*<br>Unadjusted analysis            | 6/8                                             |
| <b>Fakih et al. (2021)</b>     | 2<br>Reported and adequate       | 1*<br>Historical cohort    | 1*<br>Potential confounders among baseline                 | 1*<br>Unadjusted analysis            | 5/8                                             |

|                             |                            |                            |                                                            |                            |     |
|-----------------------------|----------------------------|----------------------------|------------------------------------------------------------|----------------------------|-----|
|                             |                            |                            | characteristics                                            |                            |     |
| <b>Gidaro et al. (2020)</b> | 2<br>Reported and adequate | 2<br>Reported and adequate | 1*<br>Potential confounders among baseline characteristics | 2<br>Reported and adequate | 7/8 |
| <b>Hughes et al. (2020)</b> | 2<br>Reported and adequate | 1*<br>Historical cohort    | 1*<br>Potential confounders among baseline characteristics | 1*<br>Unadjusted analysis  | 5/8 |
| <b>Marcus et al. (2021)</b> | 2<br>Reported and adequate | 1*<br>Historical cohort    | 1*<br>Potential confounders among baseline characteristics | 1*<br>Unadjusted analysis  | 5/8 |
| <b>Thelen et al. (2021)</b> | 2<br>Reported and adequate | 1*<br>Historical cohort    | 1*<br>Potential confounders among baseline characteristics | 1*<br>Unadjusted analysis  | 5/8 |

**Table S4. Quality assessment of studies according to MINORS additional score for comparative studies.**

Qualitative assessment was performed using the MINORS score. The four items are scored 0 (not reported), 1 (reported but inadequate) or 2 (reported and adequate). The global ideal score being 24 (sum of non-comparative and comparative study items) for comparative studies.

\* For the domains judged as 'reported but inadequate', the table provides a brief explanation of the detected reason for inadequacy.
